# Supplementary material for: Nonvolatile transistor memory devices using high dielectric constant polyimide electrets
Source: Royal Society of Chemistry journal article supplement (doi:10.1039/c3tc30252k), 2013-01-01
Supplement: c3tc30252k.pdf [file c3tc30252k.pdf]

## Supporting Information

### Nonvolatile Transistor Memory Devices using

### High Dielectric Constant Polyimides Electrets

Ying-Hsuan Chou,<sup>1,+</sup> Hung-Ju Yen,<sup>2,+</sup> Chia-Liang Tsai,<sup>2</sup> Wen-Ya Lee,<sup>1</sup>

Guey-Sheng Liou,<sup>2,\*</sup> and Wen-Chang Chen<sup>1,2,\*</sup>

<sup>1</sup>Department of Chemical Engineering, National Taiwan University, Taipei,  
Taiwan 10617

<sup>2</sup>Institute of Polymer Science and Engineering, National Taiwan University, Taipei,  
Taiwan 10617

\*To whom all correspondence should be addressed.

Wen-Chang Chen (e-mail:chenwc@ntu.edu.tw); Guey-Sheng Liou (e-mail:

[gsliau@ntu.edu.tw](mailto:gsliau@ntu.edu.tw))

+equal contribution to this work.

**Table S1.** Inherent Viscosity<sup>a</sup> and Solubility Behavior of Polyimides

| Code                   | $\eta_{\text{inh}}$<br>(dL/g) | Solubility in various Solvent <sup>b</sup> |      |     |                  |     |                   |
|------------------------|-------------------------------|--------------------------------------------|------|-----|------------------|-----|-------------------|
|                        |                               | NMP                                        | DMAc | DMF | <i>m</i> -Cresol | THF | CHCl <sub>3</sub> |
| <b>PI(BTDA-TPA-CN)</b> | 0.97                          | ++                                         | ++   | ++  | ++               | +-  | ++                |
| <b>PI(DSDA-TPA-CN)</b> | 0.42                          | ++                                         | ++   | ++  | ++               | +-  | +-                |
| <b>PI(6FDA-TPA-CN)</b> | 0.94                          | ++                                         | ++   | ++  | ++               | ++  | ++                |

<sup>a</sup> Measured at a polymer concentration of 0.5 g/dL in DMAc at 30 °C.

<sup>b</sup> The solubility was determined with a 10 mg sample in 1 mL of a solvent. ++, soluble at room temperature; +, soluble on heating; +-, partially soluble or swelling.

**Table S2.** Thermal Properties of Polyimides<sup>a</sup>

| Polymer<br>code        | $T_d^5$ (°C) <sup>b</sup> |     | $T_d^{10}$ (°C) <sup>b</sup> |     | $R_{w800}$ (%) <sup>c</sup> |
|------------------------|---------------------------|-----|------------------------------|-----|-----------------------------|
|                        | N <sub>2</sub>            | Air | N <sub>2</sub>               | Air |                             |
| <b>PI(BTDA-TPA-CN)</b> | 620                       | 605 | 650                          | 645 | 70                          |
| <b>PI(DSDA-TPA-CN)</b> | 535                       | 550 | 575                          | 595 | 62                          |
| <b>PI(6FDA-TPA-CN)</b> | 590                       | 580 | 620                          | 605 | 65                          |

<sup>a</sup> The polymer film samples were heated at 300 °C for 1 h prior to all the thermal analyses.

<sup>b</sup> Temperature at which 5 % and 10% weight loss occurred, respectively, recorded by TGA at a heating rate of 20 °C/min and a gas flow rate of 20 cm<sup>3</sup>/min.

<sup>c</sup> Residual weight percentages at 800 °C under nitrogen flow.

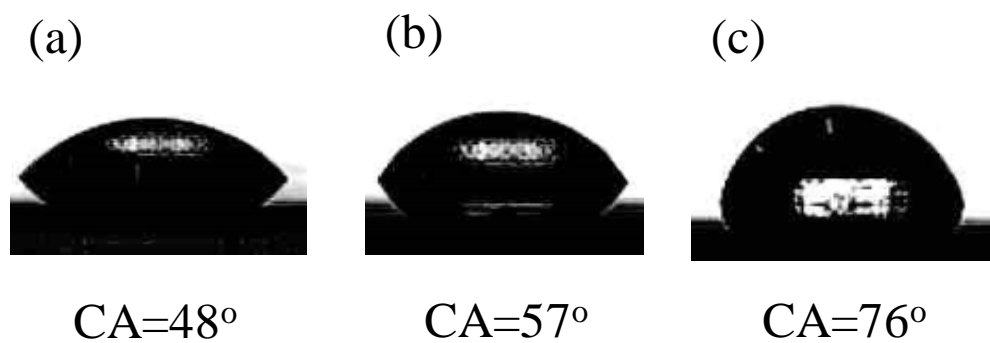

**Figure S1.** Contact angles of various polymer electrets: (a) **PI(BTDA-TPA-CN)**,  
(b) **PI(DSDA-TPA-CN)** and (c) **PI(6FDA-TPA-CN)**.

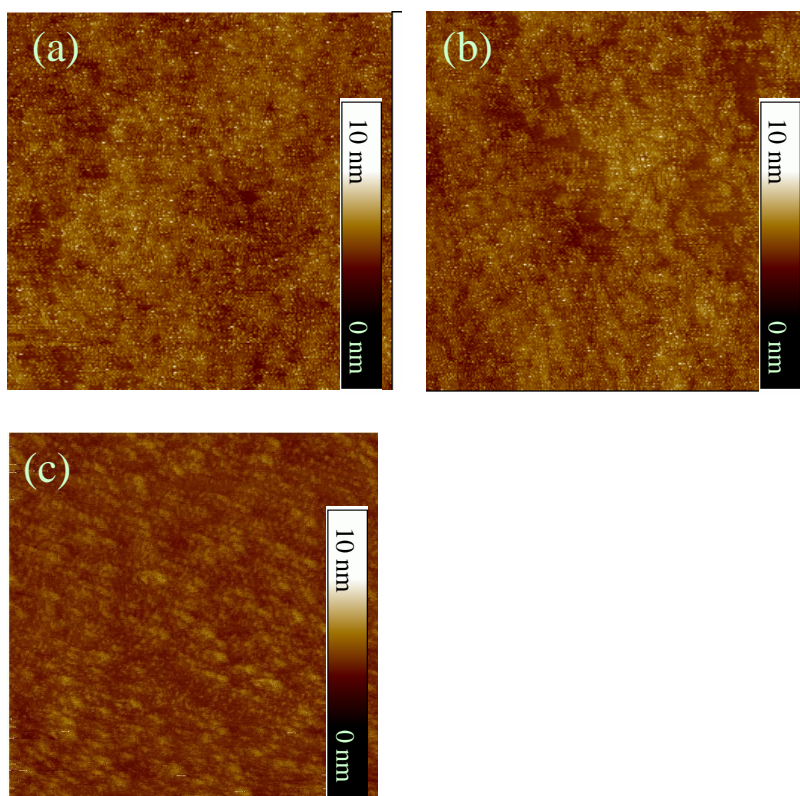

**Figure S2.** Atomic force microscopy (AFM) topographies of (a) **PI(BTDA-TPA-CN)**,  
(b) **PI(DSDA-TPA-CN)** and (c) **PI(6FDA-TPA-CN)** spin-coated on bare SiO<sub>2</sub>  
substrates on 1  $\mu\text{m}$  x 1  $\mu\text{m}$  areas.

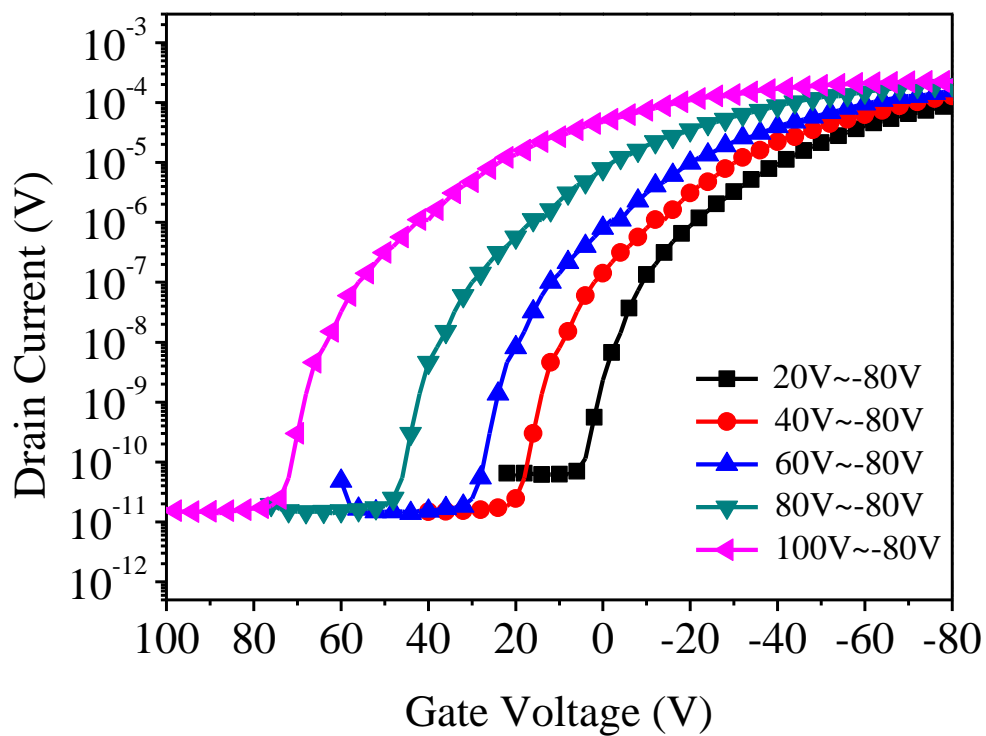

**Figure S3.** Transfer characteristics of the pentacene with **PI(6FDA-TPA-CN)** as electret. The  $V_g$  sweeps ranged from 20 to 100 V.

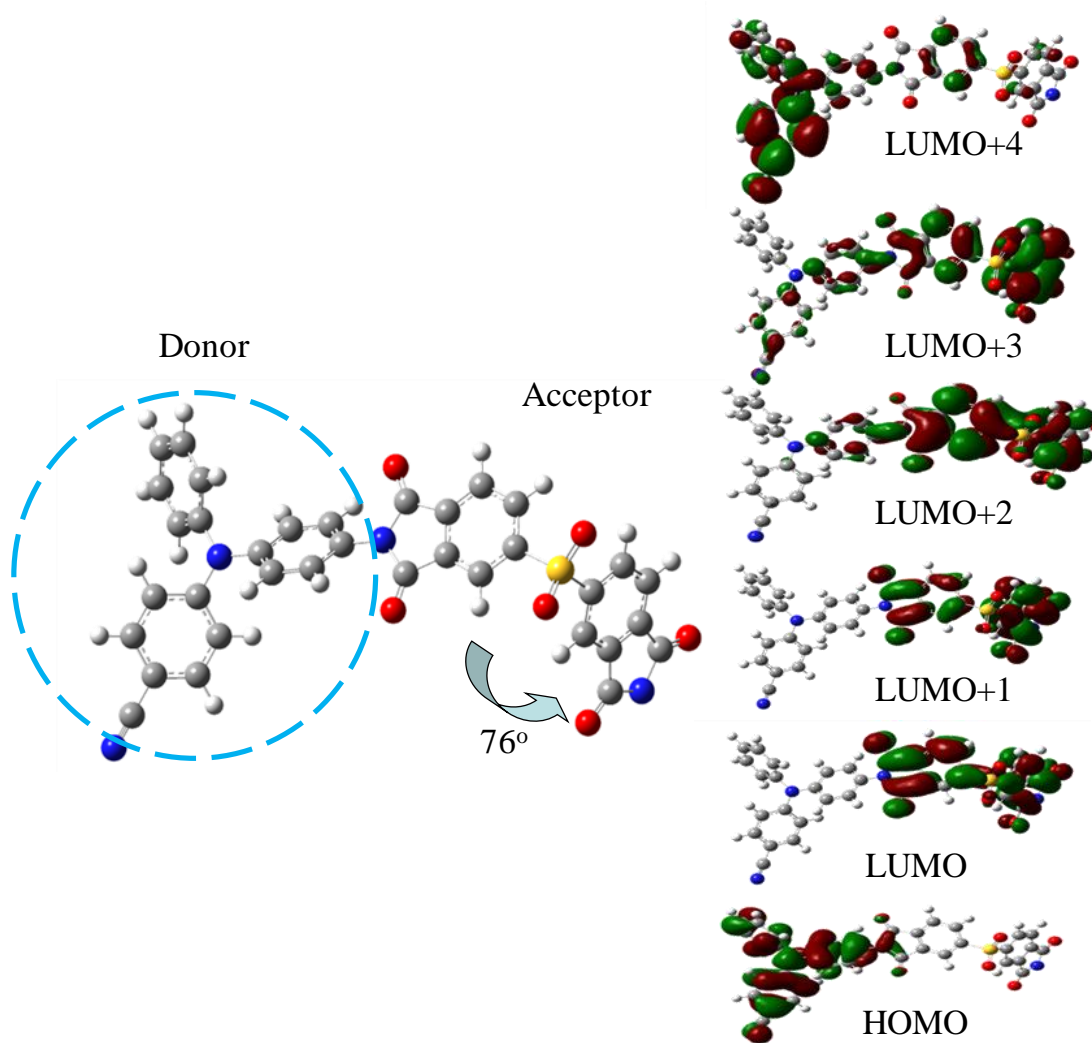

**Figure S4. Molecular orbitals of PI(DSDA-TPA-CN).**

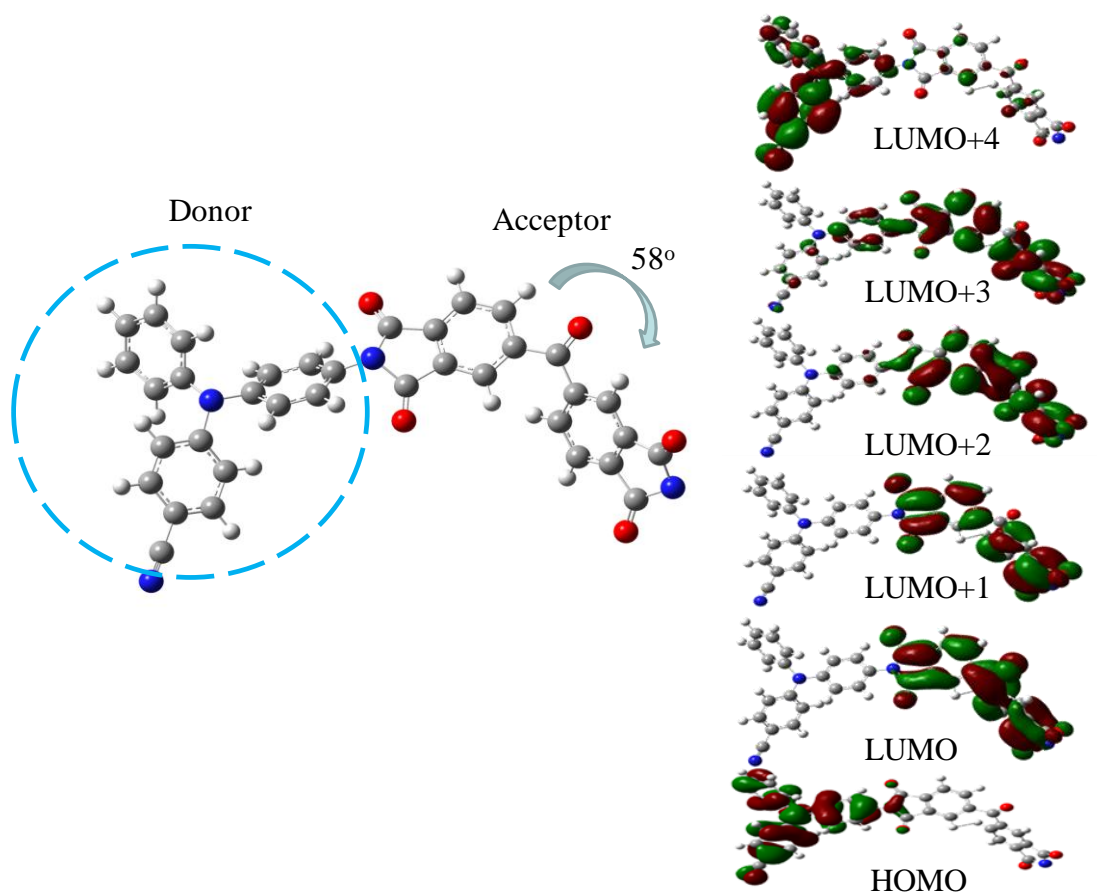

**Figure S5. Molecular orbitals of PI(BTDA-TPA-CN).**



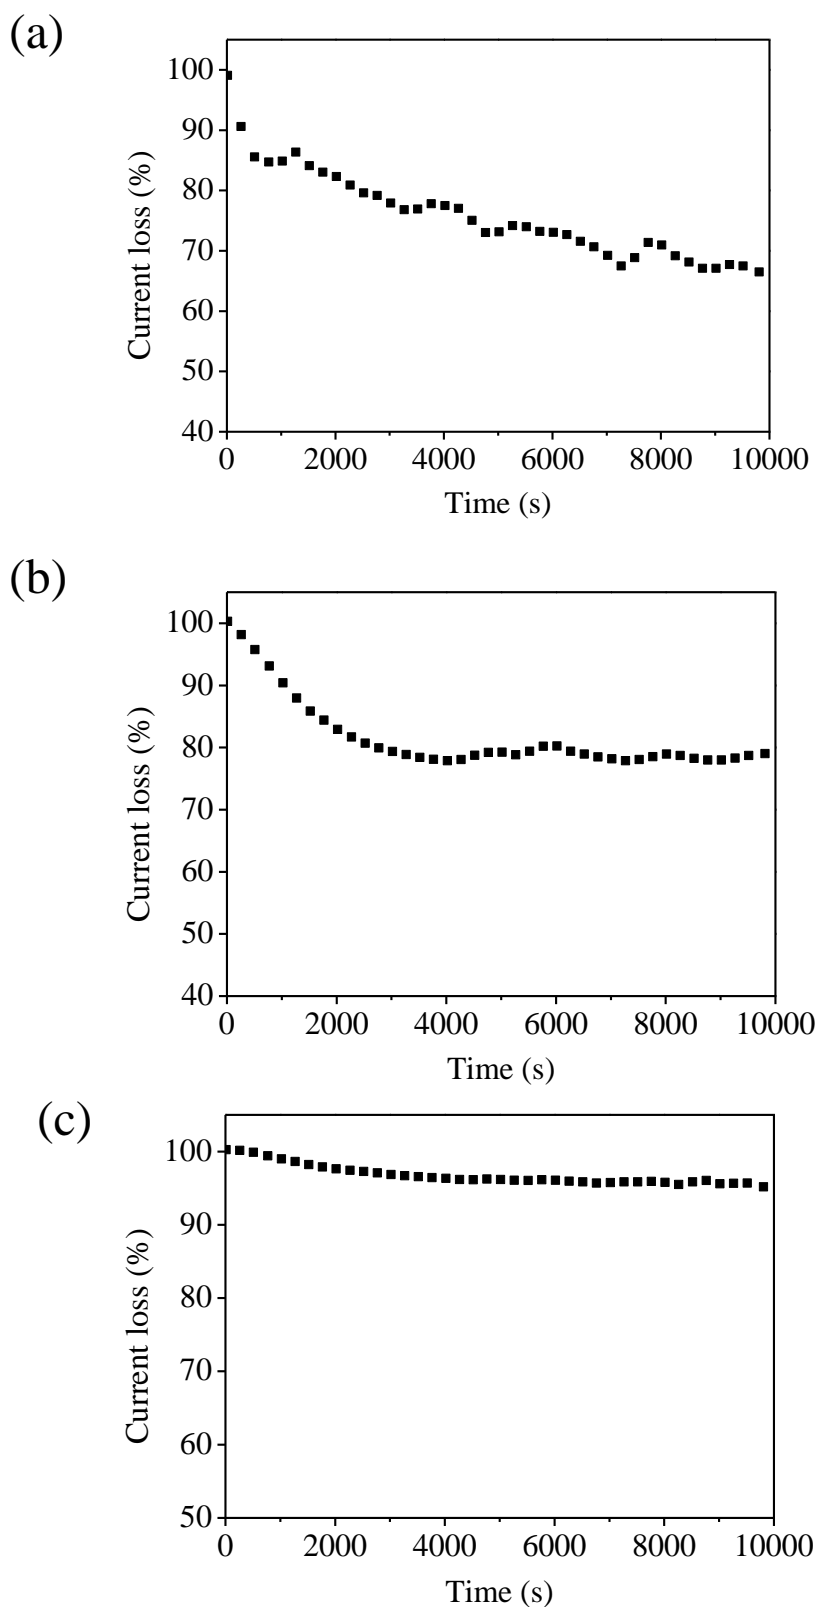

**Figure S6.** The on-current of OFET device decay through  $10^4$  s storage with (a) **PI(BTDA-TPA-CN)**, (b) **PI(DSDA-TPA-CN)** and (c) **PI(6FDA-TPA-CN)** as electrets.
